# Supplementary material
Source: PubMed Central journal article supplement (PMC4986722)
Supplement: supp_erv039_jexbot140152_file002.pdf [file supp_erv039_jexbot140152_file002.pdf]

# SI Figure 1

**Environment**

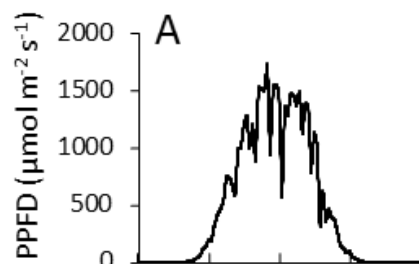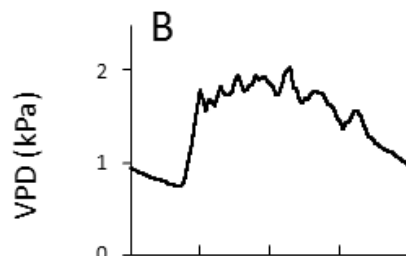

**Ex.1: Circadian conductances**

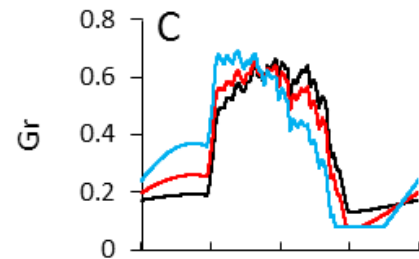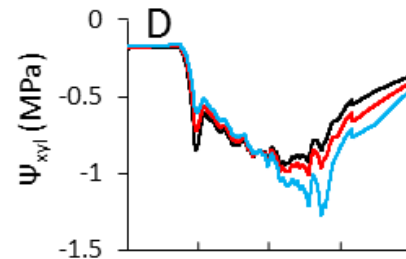

— Mod.init  
— Mod.ampli  
— Mod.Taucircad

**Ex.2: Transpiration-dependent conductances**

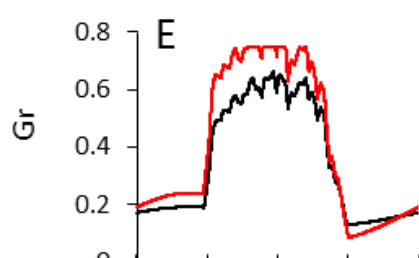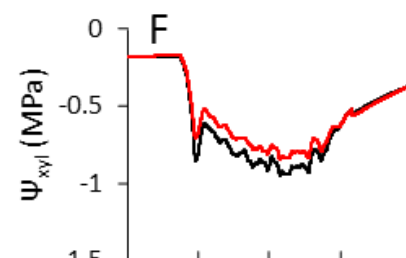

— Mod.init  
— Mod.Tautranspi

**Ex.3: Complex Soil**

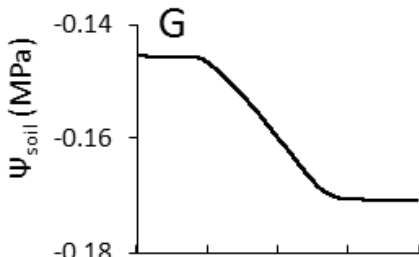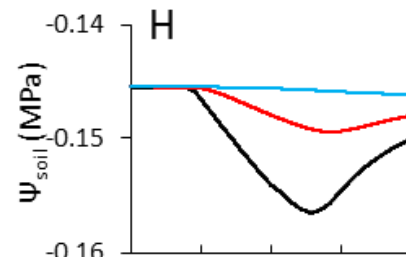

— Ψₛₒᵢₗ  
— Ψₛₒᵢₗ₂  
— Ψₛₒᵢₗ bulk

**Ex.4: Iso/Anisohydric**

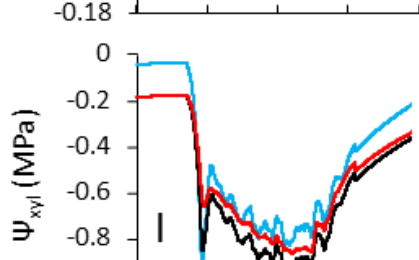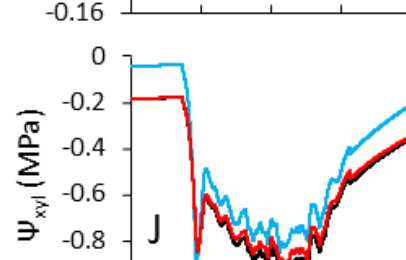

— Mod.init  
— Mod.delta (I)  
— Mod.TauABA (J)  
— Mod.WW

**Ex.5: LER in transgenics**

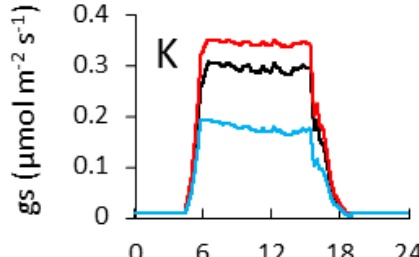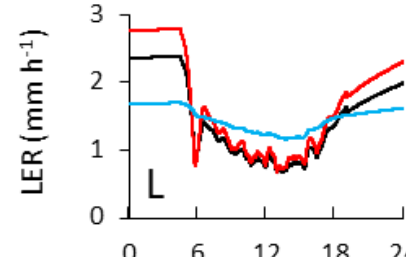

— Mod.WT  
— Mod.AS  
— Mod.sens

Time of day (h)

**SI Fig.1:** Examples of environmental conditions (A,B) in the default dataset (climate) and output variables (C to L) of simulations carried out in the 5 examples provided in the help file of the function modelhydro(). I. Simulations with changed delta value. Red (line) J. Simulations with changed  $t_{ABA}$  values.

Modelhydro

## Description

Compute the model of water transfer and leaf elongation described in Tardieu, Simonneau and Parent, Journal of Experimental Botany, 2015.

## Usage

```
modelhydro (data, ...)
```

### ## Default:

```
modelhydro (data , complexsoil = FALSE, growth = FALSE, ampliinit = 0.4
, parags = list(alpha = 0.1826 , gsmin = 0.005 , beta = -0.003 , delta
= -1 , ga=0.17) , paragr = list (Gr0 = 0.08 , Grmin = 0.08 , Grmax =
0.75, Tautranspigr = 1.2, Taucircadgr = 0.08 , TauABAgr = 0.01),
paragc = list (Gc0 = 0.08 , Gcmin = 0.08 , Gcmax = 0.75, Tautranspigc
= 1.2, Taucircadgc = 0.08 , TauABAgc = 0.01), paragxl = list (Gxl0 =
0.8 , Gxlmin = 0.2 , Gxlmax = 2.5, Tautranspigxl = 0.05, Taucircadgxl
= 0.08 , TauABAgxl = 0.01), paracap = list(ncap = 1.5, alphacap =
0.075), parasoil = list(Teta = 0.25 , soildepth = 0.5 , rcol = 0.1 ,
soilw = 7.6 , Nplant = 3) , parasoil2 = list (soildepth2 = 0.54 , rcol2
= 0.14 , soilwcol2 = 8.5 , soilwbulk = 183), parahydrodyn = list(n =
1.209321 , a1 = 3.21473540706308 , Tetasat = 0.56 , Ks = 1 , p = 0.5) ,
pararoot = list(r = 0.0001 , Lv=2000), surface = 0.02, shading = 0.2 ,
parav = list(Vsat = 11000 , Vres = 1100) ,paragro = list(aLER = 4.1 ,
cLER = 0.8 , arABA = 0.433) , paraba = list( a = -600, constit = 1, b
= 4)
```

## Arguments

|                                     |                                                                                                                       |
|-------------------------------------|-----------------------------------------------------------------------------------------------------------------------|
| <code>data</code>                   | a data frame with environmental conditions. It must contain at least:                                                 |
| <code>\$hour</code>                 | time (h)                                                                                                              |
| <code>\$PPFD</code>                 | Photosynthetic Photon Flux Density ( $\mu\text{mol m}^{-2} \text{s}^{-1}$ )                                           |
| <code>\$T</code>                    | Temperature ( $^{\circ}\text{C}$ )                                                                                    |
| <code>\$VPD</code>                  | Vapor Pressure Deficit (kPa)                                                                                          |
| <code>complexsoil</code>            | a logical value indicating whether if soil is modeled with a single column (FALSE) or the three nested columns (TRUE) |
| <code>growth</code><br>(maize only) | a logical value indicating if leaf elongation rate (LER) should be calculated (for maize only)                        |
| <code>ampliinit</code>              | amplitude of $\Psi_{s,xyl}$ before beginning of periode (MPa)                                                         |

parags a list of parameters for stomatal conductance and aerodynamic conductance (equation 1 and 2 in Tardieu, Simonneau and Parent, Journal of Experimental Botany, 2015)

|         |                              |
|---------|------------------------------|
| \$alpha | $\alpha$ in equation 1       |
| \$gsmin | $g_{s_{\min}}$ in equation 1 |
| \$beta  | $\beta$ in equation 1        |
| \$delta | $\delta$ in equation 1       |
| \$ga    | $\alpha$ in equation 2       |

paracap parameters for the pressure-volume curve, fitted with Van Genuchten equation (Van Genuchten, 1980) ; equation 11 in Tardieu, Simonneau and Parent, Journal of Experimental Botany, 2015)

|            |                                      |
|------------|--------------------------------------|
| \$ncap     | $n_{\text{cap}}$ in equation 11      |
| \$alphacap | $\alpha_{\text{cap}}$ in equation 11 |

paragr a list of parameters for the sensitivities of root hydraulic conductance Gr to transpiration (equation 8 in Tardieu, Simonneau and Parent, Journal of Experimental Botany, 2015), amplitude of water potential (equation 7) and ABA (equation 9).

|               |                                            |
|---------------|--------------------------------------------|
| \$Gr0         | $Gr_0$ in equation 8                       |
| \$Grmin       | minimum value of Gr                        |
| \$Grmax       | maximum value of Gr                        |
| \$Taucircadgr | $\tau_{\text{circad}}$ for Gr (equation 7) |
| \$Taevapgr    | $\tau_{\text{evap}}$ for Gr (equation 7)   |
| \$TauABAgr    | $\tau_{\text{ABA}}$ for Gr (equation 7)    |

paragc a list of parameters for the sensitivities of hydraulic conductance Gc to transpiration (equation 8 in Tardieu, Simonneau and Parent, Journal of Experimental Botany, 2015), amplitude of water potential (equation 7) and ABA (equation 9).

|               |                                            |
|---------------|--------------------------------------------|
| \$Gc0         | $Gc_0$ in equation 8                       |
| \$Gcmin       | minimum value of Gc                        |
| \$Gcmax       | maximum value of Gc                        |
| \$Taucircadgc | $\tau_{\text{circad}}$ for Gc (equation 7) |
| \$Taevapgc    | $\tau_{\text{evap}}$ for Gc (equation 7)   |
| \$TauABAgc    | $\tau_{\text{ABA}}$ for Gc (equation 7)    |

paragxl a list of parameters for the sensitivities of hydraulic conductance Gxl to transpiration (equation 8 in Tardieu, Simonneau and Parent, Journal of Experimental Botany, 2015), amplitude of water potential (equation 7) and ABA (equation 9).

|                |                                             |
|----------------|---------------------------------------------|
| \$Gxl0         | $G_{xl_0}$ in equation 8                    |
| \$Gxlmin       | minimum value of Gxl                        |
| \$Gxlmax       | maximum value of Gxl                        |
| \$Taucircadgxl | $\tau_{\text{circad}}$ for Gxl (equation 7) |
| \$Taevapgxl    | $\tau_{\text{evap}}$ for Gxl (equation 7)   |

|              |                                                                                                                                                 |
|--------------|-------------------------------------------------------------------------------------------------------------------------------------------------|
| \$TauABAgx1  | $\tau_{ABA}$ for $G_{x1}$ (equation 7)                                                                                                          |
| parasoil     | a list of parameters for soil characteristics in the main soil column (rhizosphere)                                                             |
| \$Teta       | initial value of soil humidity ( $g\ g^{-1}$ )                                                                                                  |
| \$soildepth  | column depth (m)                                                                                                                                |
| \$rcol       | column radius (m)                                                                                                                               |
| \$soilw      | soil dry weight (kg)                                                                                                                            |
| \$Nplant     | number of plants in the column                                                                                                                  |
| parasoil2    | a list of parameters for the second and third soil column (if <code>complexsoil = TRUE</code> )                                                 |
| \$soildepth2 | second column depth (m)                                                                                                                         |
| \$rcol2      | second column radius (m)                                                                                                                        |
| \$soilwcol2  | soil dry weight (kg) in column 2 surrounding column 1                                                                                           |
| \$soilwbulk  | soil dry weight (kg) in column 3 (bulk)                                                                                                         |
| parahydrodyn | a list of parameters for soil hydrodynamic properties (equation 4 and 5 in Tardieu, Simonneau and Parent, Journal of Experimental Botany, 2015) |
| \$n          | n in equation 4 , 5                                                                                                                             |
| \$a1         | $\alpha_v$ in equation 4 , 5                                                                                                                    |
| \$Tetasat    | $\theta_{sat}$ , soil humidity at soil saturation                                                                                               |
| \$Ks         | ks in equation 5                                                                                                                                |
| \$p          | p in equation 5                                                                                                                                 |
| pararoot     | a list of parameters for roots                                                                                                                  |
| \$r          | root radius, m                                                                                                                                  |
| \$Lv         | root length per soil volume, $m\ m^{-3}$                                                                                                        |
| surface      | Plant leaf area ( $m^2$ ).                                                                                                                      |
| shading      | a value from 0 to 1 considering selfshading                                                                                                     |
| parav        | a list of parameters for leaf volume (equation 11 in Tardieu, Simonneau and Parent, Journal of Experimental Botany, 2015)                       |
| \$Vsat       | leaf volume at saturation ( $mm^2$ )                                                                                                            |
| \$Vres       | leaf residual water volume ( $mm^2$ ).                                                                                                          |
| paragro      | a list of parameters for leaf elongation rate (equation 12 in Tardieu, Simonneau and Parent, Journal of Experimental Botany, 2015)              |
| \$aLER       | max leaf elongation rate ( $mm\ h^{-1}$ ). $a\_LER$ in equation 12                                                                              |
| \$cLER       | sensitivity to xylem water potential. $c\_LER$ in equation 12                                                                                   |

$\$a_{rABA}$  sensitivity to ABA.  $a_{r\_aba}$  in equation 12

$paraba$  a list of parameters for ABA biosynthesis (equation 3 in Tardieu, Simonneau and Parent, Journal of Experimental Botany, 2015)

$\$a$  a in equation 3

$\$constit$   $ABA_{constit}$  in equation 3

$\$b$  b in equation 3

## Value

The model is computed and a data.frame with all variables at the time step of one minute is returned.

|              |                                                                                               |
|--------------|-----------------------------------------------------------------------------------------------|
| $\$hour$     | time (h)                                                                                      |
| $\$hourday$  | hour of the day (h)                                                                           |
| $\$Tetacol1$ | humidity in first soil column (rhizosphere), $g\ g^{-1}$                                      |
| $\$T$        | Temperature ( $^{\circ}C$ )                                                                   |
| $\$PPFD$     | Photosynthetic Photon Flux Density ( $\mu mol\ m^{-2}\ s^{-1}$ )                              |
| $\$VPD$      | Vapour Pressure Deficit (kPa)                                                                 |
| $\$gs$       | Stomatal conductance ( $mol\ m^{-2}\ s^{-1}$ )                                                |
| $\$J$        | Transpiration flux per plant ( $mg\ s^{-1}$ )                                                 |
| $\$Jtot$     | Transpiration flux per column ( $mg\ s^{-1}$ )                                                |
| $\$Jxc$      | Flux ( $mg\ plant^{-1}\ s^{-1}$ ) between mature tissues and bundle sheaths                   |
| $\$Psisoil$  | Soil water potential (MPa) in soil column (rhizosphere)                                       |
| $\$Psir$     | Root water potential (MPa)                                                                    |
| $\$Psixyl$   | Xylem water potential (MPa)                                                                   |
| $\$Psicel$   | Water potential in cells considered as a capacitance (MPa)                                    |
| $\$Psievap$  | Water potential in cells of evaporative sites (MPa)                                           |
| $\$ABA$      | ABA concentration in xylem ( $pmol\ m^{-3}$ )                                                 |
| $\$Gr$       | Root hydraulic conductance ( $mg\ MPa^{-1}\ s^{-1}$ )                                         |
| $\$Gc$       | Hydraulic conductance between capacitance and evaporative sites ( $mg\ MPa^{-1}\ s^{-1}$ )    |
| $\$Gxl$      | Hydraulic conductance xylem and evaporative sites ( $mg\ MPa^{-1}\ s^{-1}$ )                  |
| $\$Jsoil1$   | Flux from column 2 (surrounding column 1) and column 1 (if <code>complexsoil = TRUE</code> )  |
| $\$Jsoil1$   | Flux from bulk soil (surrounding column 2) and column 2 (if <code>complexsoil = TRUE</code> ) |
| $\$Psisoil2$ | Soil water potential (MPa) in column 2 (if <code>complexsoil = TRUE</code> )                  |
| $\$Psibulk$  | Soil water potential (MPa) in bulk soil (if <code>complexsoil = TRUE</code> )                 |
| $\$LER$      | Leaf Elongation Rate ( $mm\ h^{-1}$ ) (if <code>growth = TRUE</code> )                        |

## References

Tardieu F., Simonneau T., Parent B. 2015. Modelling the coordination of the controls of stomatal aperture, transpiration, leaf growth and abscisic acid: update and extension of the Tardieu Davies model. Journal of Experimental Botany.

## Exemples

Some outputs of these examples are presented in SI. Fig. 1

##### Example 1 : Simulations with different former amplitudes of  $\Psi_1$  or varying options for circadian influences on conductances Gr, Gc and Gxl (SI. Fig. 1CD in Tardieu et al., 2015)

#The first simulation (mod.init) is obtained by running the model with the example dataset (climate) and default parameter values (for maize, mainly genotype B73).

```
mod.init <- modelhydro (data = climate) ## this can take a few minutes
```

# Changing the amplitude of  $\Psi_1$  on former days (mod.ampli), from 0.4 MPa (the default value) to 1.4 MPa:

```
mod.ampli <- modelhydro (data = climate , ampliinit = 1.4 )
```

# Changing the sensitivity of Gr, Gc and Gxl to the amplitude of  $\Psi_1$  (respectively paragr\$Taucircadgr, paragc\$Taucircadgc and paragxl\$Taucircadgxl) from default values (0.08) to respectively 0.15, 0.15 and 0.2.

```
mod.Taucircad <- modelhydro (data = climate , ampliinit = 1.4 ,  
paragr = list (Gr0 = 0.08 , Grmin = 0.08 , Grmax = 0.75, Tautranspigr  
= 1.2, Taucircadgr = 0.15 , TauABAgr = 0.01), paragc = list (Gc0 =  
0.08 , Gcmin = 0.08 , Gcmax = 0.75, Tautranspircg = 1.2, Taucircadgc =  
0.15 , TauABAgc = 0.01) , paragxl = list (Gxl0 = 0.8 , Gxlmin = 0.2 ,  
Gxlmax = 2.5, Tautranspigxl = 0.05, Taucircadgxl = 0.2 , TauABAgxl =  
0.01) )
```

##### Example 2 : Simulations with different sensitivities of conductances Gr and Gc to transpiration (paragr\$Tautranspigr, paragc\$Tautranspircg) either with the default values (1.2, mod.init) or increased values (1.5; mod.Tautranspi). (SI. Fig. 1EF in Tardieu et al., 2015)

```
mod.Tautranspi <- modelhydro (data = climate , paragr = list (Gr0 =  
0.08 , Grmin = 0.08 , Grmax = 0.75, Tautranspigr = 1.5, Taucircadgr =  
0.2 , TauABAgr = 0.01), paragc = list (Gc0 = 0.08 , Gcmin = 0.08 ,  
Gcmax = 0.75, Tautranspircg = 1.5, Taucircadgc = 0.2 , TauABAgc =  
0.01))
```

##### Example 3. Simulations with either considering a simple soil column (rhizosphere, default value, mod.init) or with the complex soil system with three nested columns (rhizosphere, intermediate and bulk soil; mod.complexsoil).

```
mod.complexsoil <- modelhydro (data = climate , complexsoil =
TRUE)
```

##### Example 4. Simulations for simulating plant behaviours closer to isohydric behaviour, either by modifying  $\delta$  value (parags\$delta) from -1 to -2 or changing the sensitivities of conductances Gr, Gc and Gxl to  $[ABA]_{xyl}$ .

##Simulation in well-watered conditions

```
mod.WW <- modelhydro (data = climate , parasoil = list(Teta = 0.5 ,
soildepth = 0.5 , rcol = 0.1 , soilw = 7.6 , Nplant = 3))
```

##Simulation with varying  $\delta$  value (parags\$delta)

```
mod.delta <- modelhydro (data = climate , parags = list(alpha =
0.1826 , gsmin = 0.005 , beta = -0.003 , delta = -2 , ga=0.17) )
```

## Simulation with sensitivities of conductances to  $[ABA]_{xyl}$ .

```
mod.TauABA <- modelhydro(data = climate , paragr = list (Gr0 = 0.08 ,
Grmin = 0.08 , Grmax = 0.75, Tautranspigr = 1.2, Taucircadgr = 0.08 ,
TauABAgr = 0.2) , paragc = list (Gc0 = 0.08 , Gcmin = 0.08 , Gcmax =
0.75, Tautranspircg = 1.2, Taucircadgc = 0.08 , TauABAgc = -0.2) ,
paragxl = list (Gxl0 = 0.8 , Gxlmin = 0.2 , Gxlmax = 2.5,
Tautranspigxl = 0.05, Taucircadgxl = 0.15 , TauABAgxl = -0.2) )
```

##### Example 5. Simulations with transgenic plants affected on ABA biosynthesis as in Parent et al., 2009. Parameters of ABA biosynthesis (paraba), leaf area(surface) and root length (pararoot) are affected.

```
geno <- c ("AS" , "WT" , "sens")
mulroot <- c(1 , 1 , 0.4)
mulS <- c (1 , 1 , 0.2)
a.geno <- c (-200 , -600 , -50)
constit.geno <- c (0 , 0 , 150)
```

```
for (i in 1:3){
  mod <- modelhydro (data = climate , complexsoil = TRUE ,
growth = TRUE, surface = 0.02 * mulS[i] , paraba = list( a =
a.geno[i], constit = constit.geno[i], b = 4) , pararoot = list(r
= 0.0001 , Lv = 2000 * mulroot[i]) )
  assign (paste ("mod" , geno[i] , sep = ".") , mod )
} ## this can take a few minutes
```
